# Supplementary material for: One-pot catalyst-switching synthesis of thermoresponsive amphiphilic diblock copolymers consisting of poly(N,N-diethylacrylamide) and biodegradable polyesters
Source: Royal Society of Chemistry journal article supplement (doi:10.1039/d3py00195d), 2023-01-01
Supplement: d3py00195d1.pdf [file d3py00195d1.pdf]

## Supporting Information

### One-pot Catalyst-switching Synthesis of Thermoresponsive Amphiphilic Diblock Copolymers Consisting of Poly(*N,N*-diethylacrylamide) and Biodegradable Polyesters

Xiangming Fu,<sup>a</sup> Yanqiu Wang,<sup>a</sup> Atsushi Narumi,<sup>b</sup> Shin-ichiro Sato,<sup>c</sup> Xiande Shen,<sup>\*,a,d</sup> and

Toyaji Kakuchi<sup>\*,a,c,d</sup>

<sup>a</sup> Research Center for Polymer Materials, School of Materials Science and Engineering,  
Changchun University of Science and Technology, Weixing Road 7989, Jilin 130022, China

<sup>b</sup> Graduate School of Organic Materials Science, Yamagata University, 4-3-16 Jonan,  
Yonezawa, Yamagata 992-8510, Japan

<sup>c</sup> Division of Applied Chemistry, Faculty of Engineering, Faculty of Engineering, Hokkaido  
University, Sapporo, Hokkaido 060-8628, Japan

<sup>d</sup> Chongqing Research Institute, Changchun University of Science and Technology, No. 618  
Liangjiang Avenue, Longxing Town, Yubei District, Chongqing City 401135, China

CORRESPONDING AUTHOR FOOTNOTE

Tel & Fax: +81-11-706-6602. E-mail: [kakuchi@eng.hokudai.ac.jp](mailto:kakuchi@eng.hokudai.ac.jp)

## Contents

|                                                                                                                                                                                            |    |
|--------------------------------------------------------------------------------------------------------------------------------------------------------------------------------------------|----|
| 1. Tables of PDEAm <sub>x</sub> -OH, PDEAM <sub>x</sub> -b-PTMC <sub>y</sub> and PDEAm <sub>x</sub> -b-PLLA <sub>y</sub> .....                                                             | 3  |
| 2. SEC(RI) traces of PDEAm <sub>x</sub> -b-PCL <sub>y</sub> , PDEAM <sub>x</sub> -b-PTMC <sub>y</sub> and PDEAm <sub>x</sub> -b-PLLA <sub>y</sub> .....                                    | 6  |
| 3. <sup>1</sup> H NMR spectra of PDEAm- <i>b</i> -PTMC and PDEAm- <i>b</i> -PLLA .....                                                                                                     | 9  |
| 4. Dynamic <sup>1</sup> H NMR spectroscopy of PDEAm <sub>30</sub> - <i>b</i> -PTMC <sub>70</sub> and PDEAm <sub>30</sub> - <i>b</i> -PLLA <sub>70</sub> .....                              | 10 |
| 5. hydrodynamic radius (Rh) of PDEAm <sub>x</sub> - <i>b</i> -PCL <sub>y</sub> , PDEAM <sub>x</sub> -b-PTMC <sub>y</sub> and PDEAm <sub>x</sub> -b-PLLA <sub>y</sub> at 25°C and 55°C..... | 11 |

## 1. Table of PDEAm<sub>x</sub>-OH, PDEAm<sub>x</sub>-*b*-PTMC<sub>y</sub>, and PDEAm<sub>x</sub>-*b*-PLLA<sub>y</sub>

**Table S1.** Preparation for a stock solution of PDEAm-OH in CH<sub>2</sub>Cl<sub>2</sub> by i) the equimolar hydrosilylation of MAm-OTBDMS and Me<sub>2</sub>EtSiH using B(C<sub>6</sub>F<sub>5</sub>)<sub>3</sub><sup>a</sup> and ii) the GTP of DEAm using Me<sub>3</sub>SiNTf<sub>2</sub>,<sup>b</sup> followed by iii) the deprotection using TBAF<sup>c</sup>

| PDEAm <sub>x</sub> -OH  | [DEAm] <sub>0</sub> /[SKAm <sup>Me<sub>2</sub>Et</sup> -OTBDMS] <sub>0</sub> | Time<br>/ h | <i>M</i> <sub>n,calcd</sub> <sup>d</sup><br>/ kg mol <sup>-1</sup> | <i>M</i> <sub>n,SEC</sub> ( <i>M</i> <sub>w</sub> / <i>M</i> <sub>n</sub> ) <sup>e</sup><br>/ kg mol <sup>-1</sup> | <i>T</i> <sub>cp</sub> <sup>f</sup> |
|-------------------------|------------------------------------------------------------------------------|-------------|--------------------------------------------------------------------|--------------------------------------------------------------------------------------------------------------------|-------------------------------------|
| PDEAm <sub>30</sub> -OH | 30                                                                           | 6           | 3.8                                                                | 3.6 (1.07)                                                                                                         | 53.8                                |
| PDEAm <sub>40</sub> -OH | 40                                                                           | 6           | 5.1                                                                | 4.8 (1.08)                                                                                                         | 52.5                                |
| PDEAm <sub>50</sub> -OH | 50                                                                           | 6           | 6.4                                                                | 6.2 (1.08)                                                                                                         | 51.9                                |
| PDEAm <sub>60</sub> -OH | 60                                                                           | 6           | 7.7                                                                | 7.9 (1.07)                                                                                                         | 51.5                                |
| PDEAm <sub>70</sub> -OH | 70                                                                           | 6           | 8.9                                                                | 8.7 (1.09)                                                                                                         | 51.0                                |
| PDEAm <sub>80</sub> -OH | 80                                                                           | 7           | 10.1                                                               | 9.9 (1.10)                                                                                                         | 50.5                                |
| PDEAm <sub>90</sub> -OH | 90                                                                           | 8           | 11.4                                                               | 10.5 (1.10)                                                                                                        | 49.9                                |

<sup>a</sup> Solvent, CH<sub>2</sub>Cl<sub>2</sub>; room temperature; argon atmosphere; MAm-OTBDMS, 0.22 mmol; [MAm-OTBDMS]<sub>0</sub>/[Me<sub>2</sub>EtSiH]<sub>0</sub>/[B(C<sub>6</sub>F<sub>5</sub>)<sub>3</sub>]<sub>0</sub> = 1.1/1.0/0.25. <sup>b</sup> [DEAm]<sub>0</sub>, 1.0 mol L<sup>-1</sup>; SKAm<sup>Me<sub>2</sub>Et</sup>-OTBDMS, 0.20 mmol; [SKAm<sup>Me<sub>2</sub>Et</sup>-OTBDMS]<sub>0</sub>/[Me<sub>3</sub>SiNTf<sub>2</sub>]<sub>0</sub>, 1/0.05; monomer conversion determined by <sup>1</sup>H NMR spectra in CDCl<sub>3</sub>, >99%. <sup>c</sup> Tetrabutylammonium fluoride (TBAF) solution, 1.0 mol L<sup>-1</sup> in THF. <sup>d</sup> *M*<sub>n,calcd</sub> = (MW of PDEAm-OH) + [TMC]<sub>0</sub>/[PDEAm-OH]<sub>0</sub> x (monomer conversion) x (MW of TMC) + (M.W. of H) x 2. <sup>e</sup> Determined by SEC equipped with a RI detector in DMF containing LiCl (0.01 mol L<sup>-1</sup>) using PMMA standards. <sup>f</sup> Determined by UV-vis measurements in water (3 g L<sup>-1</sup>).

**Table S2.** Synthesis of PDEAm-*b*-PTMC by the ring-opening polymerization (ROP) of trimethylene carbonate (TMC) using PDEAm-OH as the macroinitiator and *t*-Bu-P<sub>2</sub> as the organocatalyst <sup>a</sup>

| Sample code                                        | [TMC] <sub>0</sub> /[PDEAm-OH] <sub>0</sub> | $M_{n,calcd}$ <sup>b</sup> | $M_{n,SEC} (M_w/M_n)$ <sup>c</sup> |
|----------------------------------------------------|---------------------------------------------|----------------------------|------------------------------------|
|                                                    |                                             | / kg mol <sup>-1</sup>     | / kg mol <sup>-1</sup>             |
| PDEAm <sub>30</sub> - <i>b</i> -PTMC <sub>70</sub> | 70                                          | 11.0                       | 11.5 (1.10)                        |
| PDEAm <sub>40</sub> - <i>b</i> -PTMC <sub>60</sub> | 60                                          | 11.2                       | 11.7 (1.18)                        |
| PDEAm <sub>50</sub> - <i>b</i> -PTMC <sub>50</sub> | 50                                          | 11.5                       | 11.2 (1.17)                        |
| PDEAm <sub>60</sub> - <i>b</i> -PTMC <sub>40</sub> | 40                                          | 11.7                       | 12.5 (1.10)                        |
| PDEAm <sub>70</sub> - <i>b</i> -PTMC <sub>30</sub> | 30                                          | 12.0                       | 12.2 (1.09)                        |
| PDEAm <sub>80</sub> - <i>b</i> -PTMC <sub>20</sub> | 20                                          | 12.2                       | 13.2 (1.09)                        |
| PDEAm <sub>90</sub> - <i>b</i> -PTMC <sub>10</sub> | 10                                          | 12.5                       | 13.5 (1.19)                        |

<sup>a</sup> [TMC]<sub>0</sub>, 1.0 mol L<sup>-1</sup>; solvent, CH<sub>2</sub>Cl<sub>2</sub>; room temperature; argon atmosphere; polymerization time, 24 h; monomer conversion determined by <sup>1</sup>H NMR spectra in CDCl<sub>3</sub>, >99%. <sup>b</sup>  $M_{n,calcd} = (\text{MW of PDEAm-OH}) + [\text{TMC}]_0/[\text{PDEAm-OH}]_0 \times (\text{monomer conversion}) \times (\text{MW of TMC}) + (\text{M.W. of H}) \times 2$ . <sup>c</sup> Determined by SEC equipped with a RI detector in DMF containing LiCl (0.01 mol L<sup>-1</sup>) using PMMA standards.

**Table S3.** Synthesis of PDEAm-*b*-PLLA by the ring-opening polymerization (ROP) of L-lactide (L-LA) using PDEAm-OH as the macroinitiator and *t*-Bu-P<sub>2</sub> as the organocatalyst <sup>a</sup>

| Sample code                                        | [L-LA] <sub>0</sub> /[PDEAm-OH] <sub>0</sub> | $M_{n,calcd}$ <sup>b</sup> | $M_{n,SEC} (M_w/M_n)$ <sup>c</sup> |
|----------------------------------------------------|----------------------------------------------|----------------------------|------------------------------------|
|                                                    |                                              | / kg mol <sup>-1</sup>     | / kg mol <sup>-1</sup>             |
| PDEAm <sub>30</sub> - <i>b</i> -PLLA <sub>70</sub> | 70                                           | 13.9                       | 11.6 (1.13)                        |
| PDEAm <sub>40</sub> - <i>b</i> -PLLA <sub>60</sub> | 60                                           | 13.7                       | 11.2 (1.16)                        |
| PDEAm <sub>50</sub> - <i>b</i> -PLLA <sub>50</sub> | 50                                           | 13.5                       | 12.5 (1.17)                        |
| PDEAm <sub>60</sub> - <i>b</i> -PLLA <sub>40</sub> | 40                                           | 13.4                       | 11.8 (1.15)                        |
| PDEAm <sub>70</sub> - <i>b</i> -PLLA <sub>30</sub> | 30                                           | 13.2                       | 13.9 (1.19)                        |
| PDEAm <sub>80</sub> - <i>b</i> -PLLA <sub>20</sub> | 20                                           | 13.0                       | 12.9 (1.20)                        |
| PDEAm <sub>90</sub> - <i>b</i> -PLLA <sub>10</sub> | 10                                           | 12.9                       | 14.3 (1.14)                        |

<sup>a</sup> [L-LA]<sub>0</sub>, 1.0 mol L<sup>-1</sup>; solvent, CH<sub>2</sub>Cl<sub>2</sub>; room temperature; argon atmosphere; polymerization time, 24 h; monomer conversion determined by <sup>1</sup>H NMR spectra in CDCl<sub>3</sub>, >99%. <sup>b</sup>  $M_{n,calcd} = (\text{MW of PDEAm-OH}) + [\text{L-LA}]_0/[\text{PDEAm-OH}]_0 \times (\text{monomer conversion}) \times (\text{MW of L-LA}) + (\text{MW of H}) \times 2$ . <sup>c</sup> Determined by SEC equipped with a RI detector in DMF containing LiCl (0.01 mol L<sup>-1</sup>) using PMMA standards.

## 2. SEC(RI) traces of PDEAM<sub>x</sub>-*b*-PTMC<sub>y</sub> and PDEAM<sub>x</sub>-*b*-PLLA<sub>y</sub>

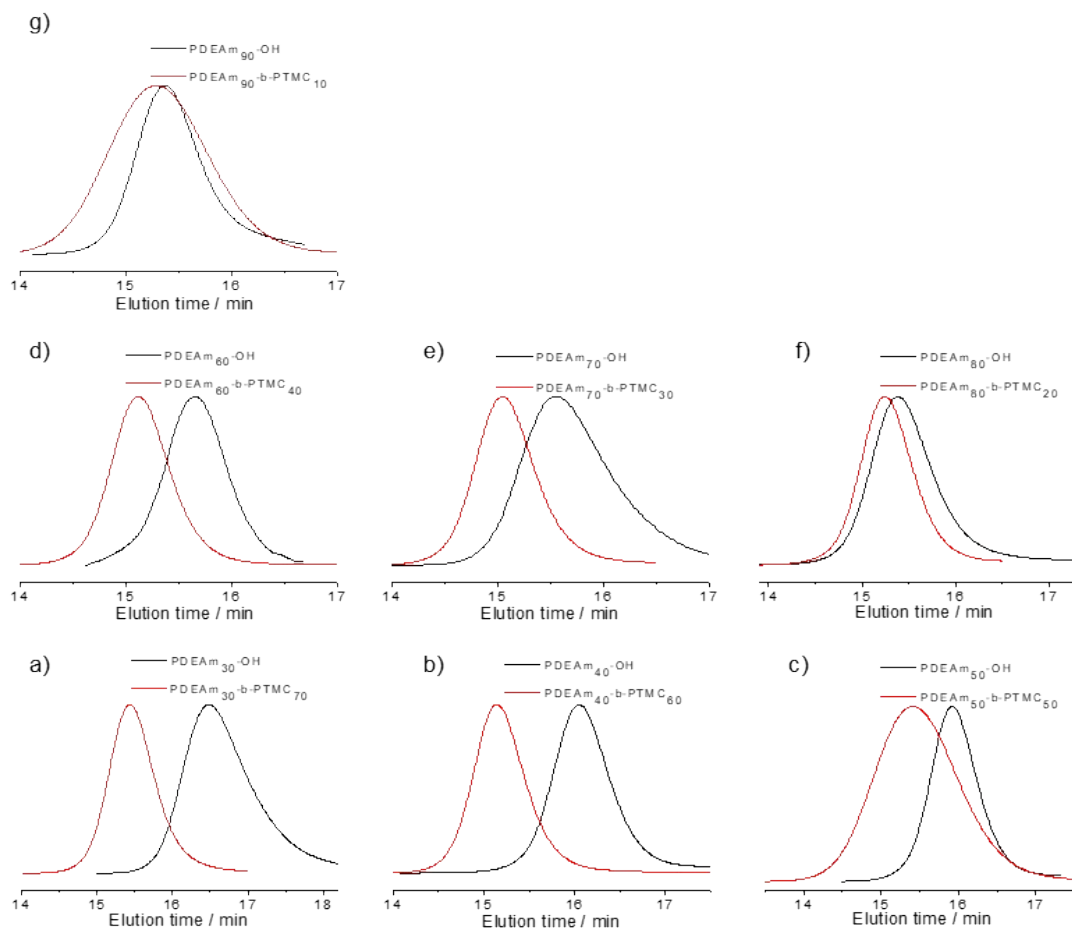

Figure S1. SEC traces of PDEAM and PDEAM-*b*-PTMC in CDCl<sub>3</sub>.

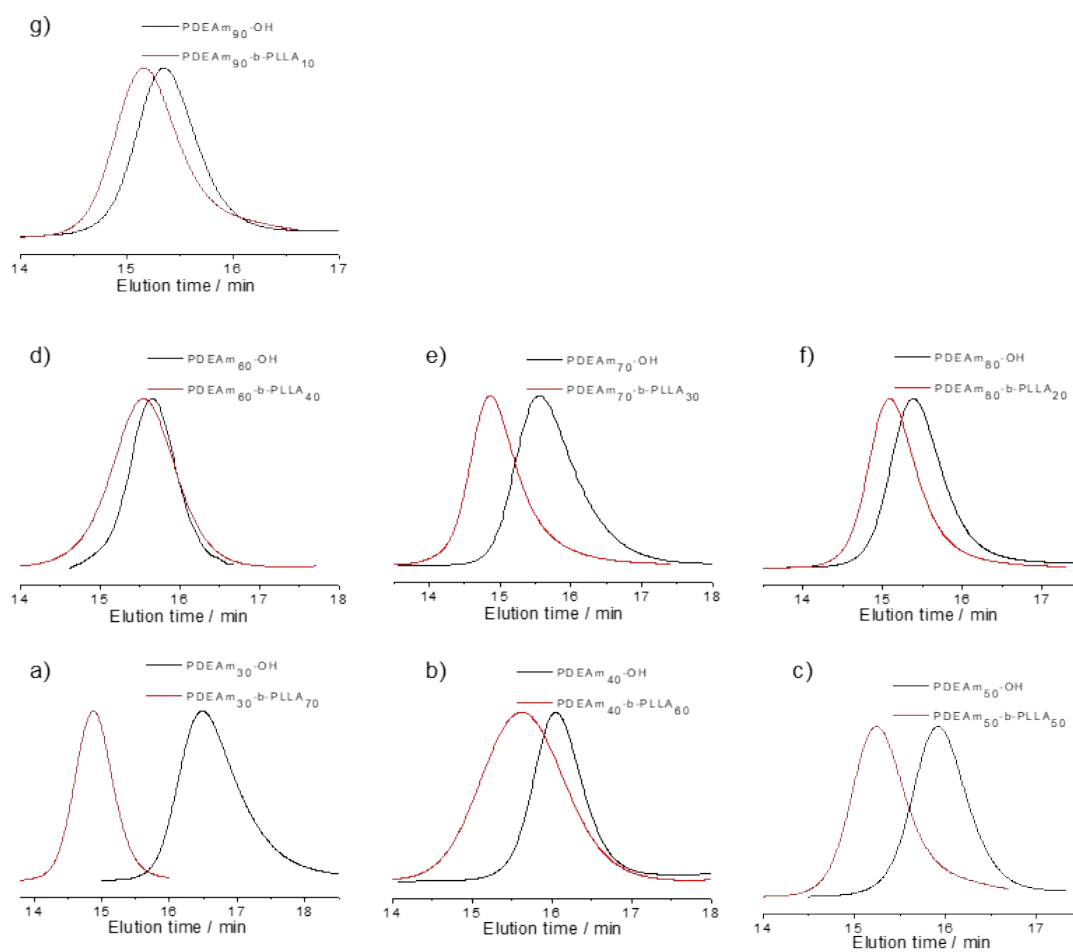

Figure S2. SEC traces PDEAm and of PDEAm-*b*-PLLA in CDCl<sub>3</sub>.

### 3. $^1\text{H}$ NMR spectra of PDEAm-*b*-PTMC and PDEAm-*b*-PLLA

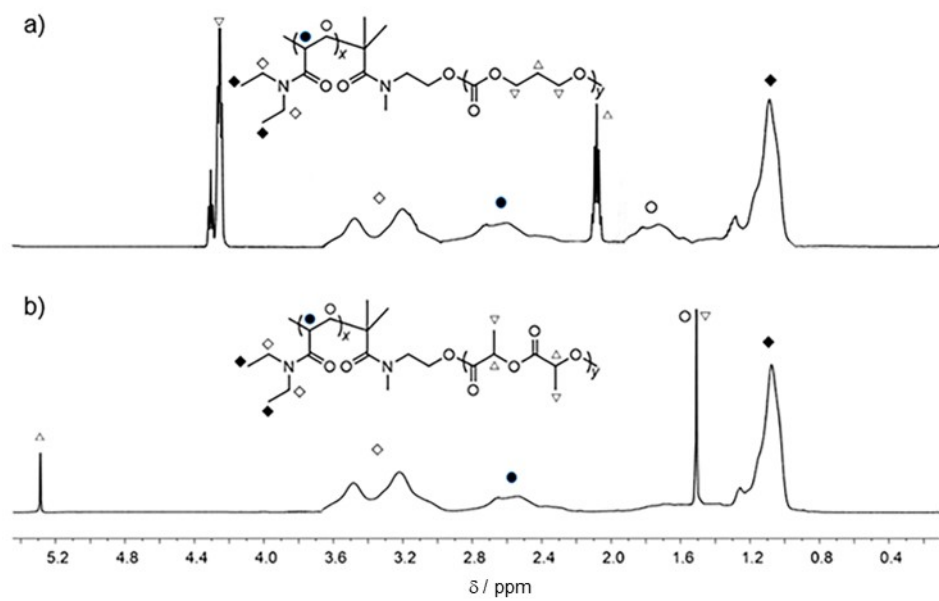

Figure S3.  $^1\text{H}$  NMR spectra of a) PDEAm-*b*-PTMC and b) PDEAm-*b*-PLLA in  $\text{CDCl}_3$ .



#### 4. Dynamic $^1\text{H}$ NMR spectroscopy of $\text{PDEAm}_{30}\text{-}b\text{-PTMC}_{70}$ and $\text{PDEAm}_{30}\text{-}b\text{-PLLA}_{70}$

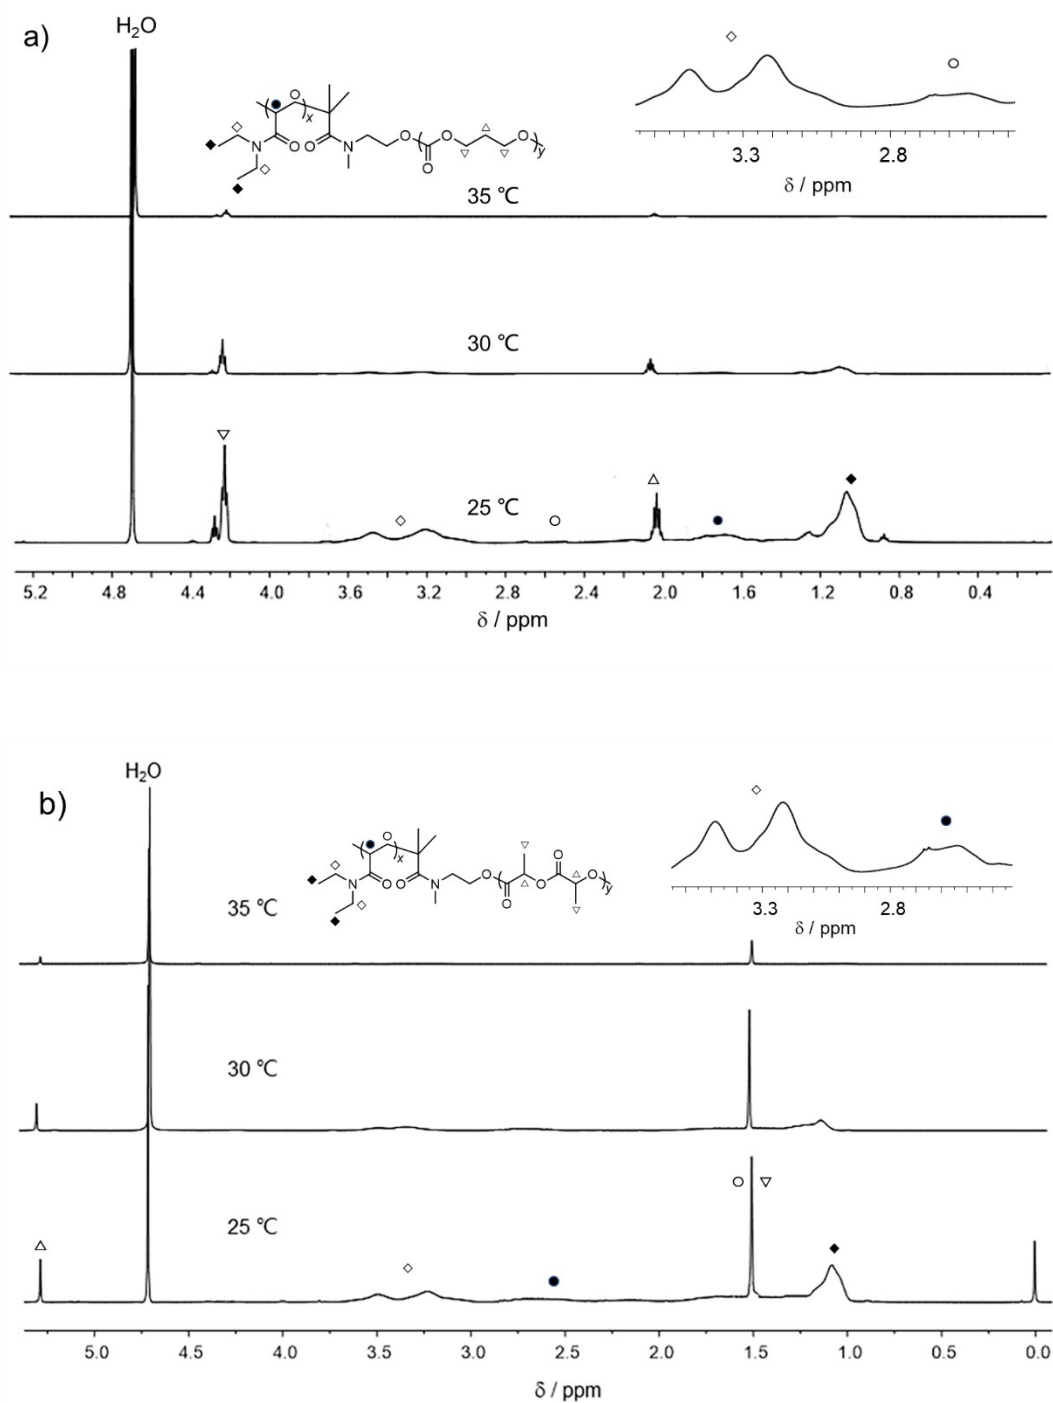

Figure S4.  $^1\text{H}$  NMR spectra of a)  $\text{PDEAm}_{30}\text{-}b\text{-PTMC}_{70}$  and b)  $\text{PDEAm}_{30}\text{-}b\text{-PLLA}_{70}$  measured at 25, 30, 35  $^\circ\text{C}$  in  $\text{D}_2\text{O}$ .

**5. Distribution of hydrodynamic radius (Rh) of PDEAM<sub>x</sub>-b-PCL<sub>y</sub>, PDEAM<sub>x</sub>-b-PTMC<sub>y</sub>, and PDEAM<sub>x</sub>-b-PLLA<sub>y</sub> at 25°C and 55°C**

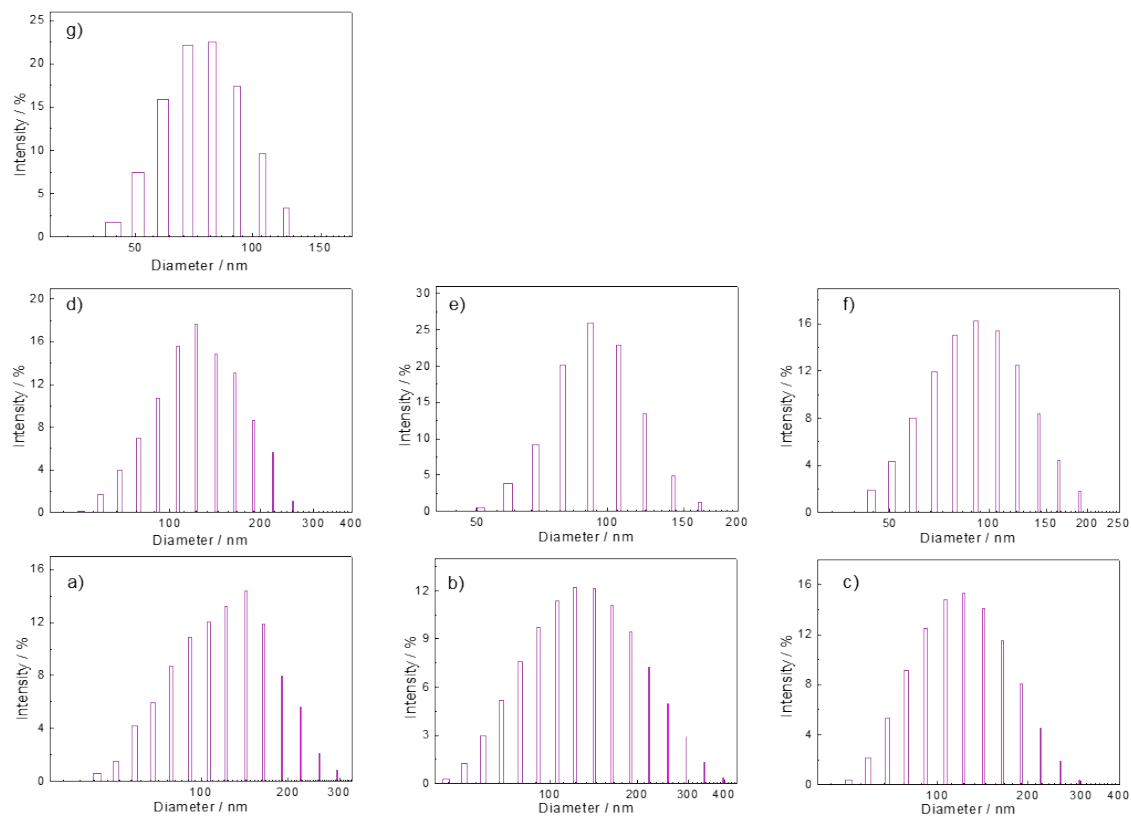

Figure S5. Distribution of hydrodynamic radii for PDEAM<sub>x</sub>-b-PCL<sub>y</sub> with x/y ratios of (a) 30/70, (b) 40/60, (c) 50/50, (d) 60/40, (e) 70/30, (f) 80/20, and (g) 90/10 at 25°C.

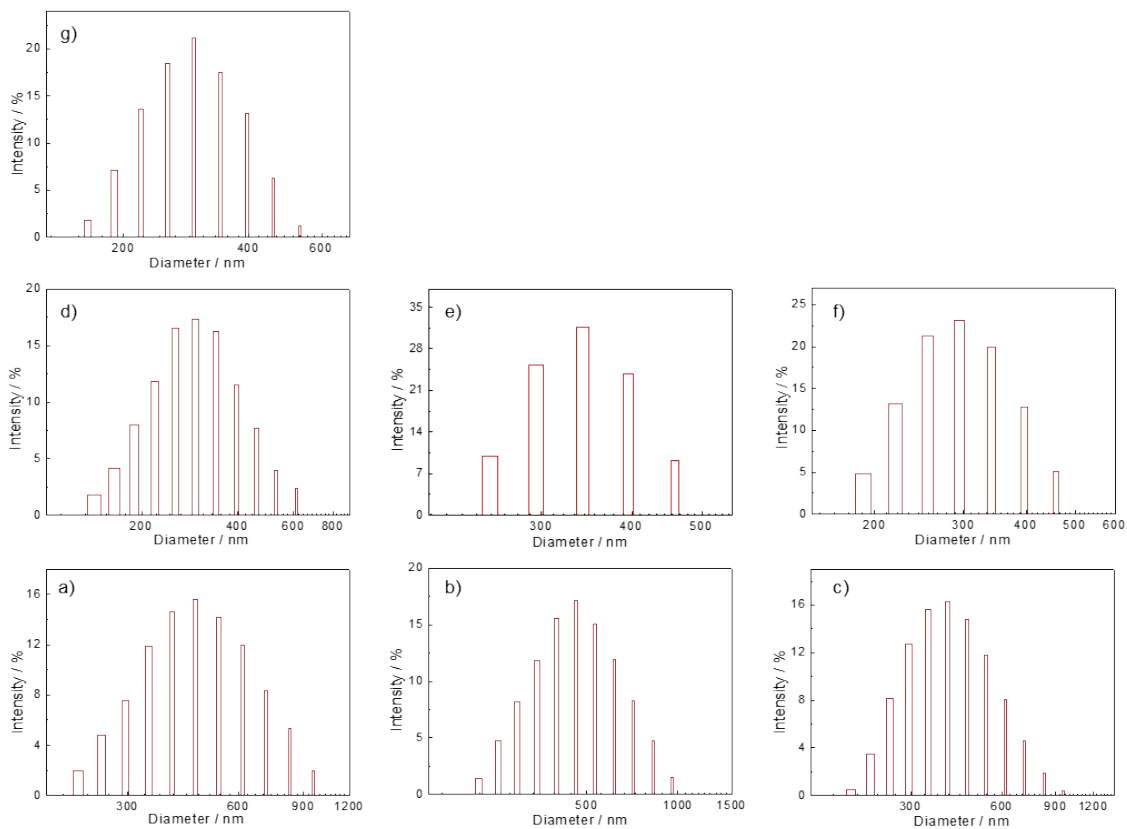

Figure S6. Distribution of hydrodynamic radii for PDEAm<sub>x</sub>-b-PCL<sub>y</sub> with  $x/y$  ratios of (a) 30/70, (b) 40/60, (c) 50/50, (d) 60/40, (e) 70/30, (f) 80/20, and (g) 90/10 at 55°C.

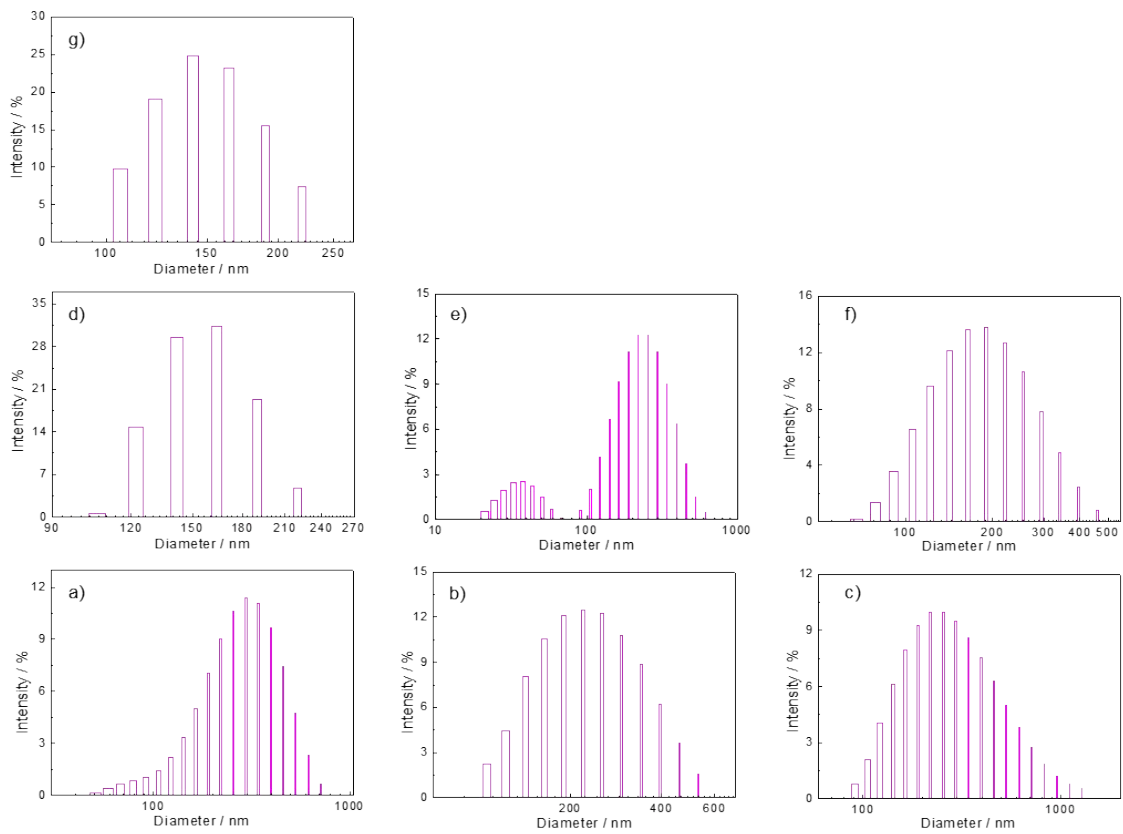

Figure S7. Distribution of hydrodynamic radii for PDEAm<sub>x</sub>-b-PTMC<sub>y</sub> with  $x/y$  ratios of (a) 30/70, (b) 40/60, (c) 50/50, (d) 60/40, (e) 70/30, (f) 80/20, and (g) 90/10 at 25°C.

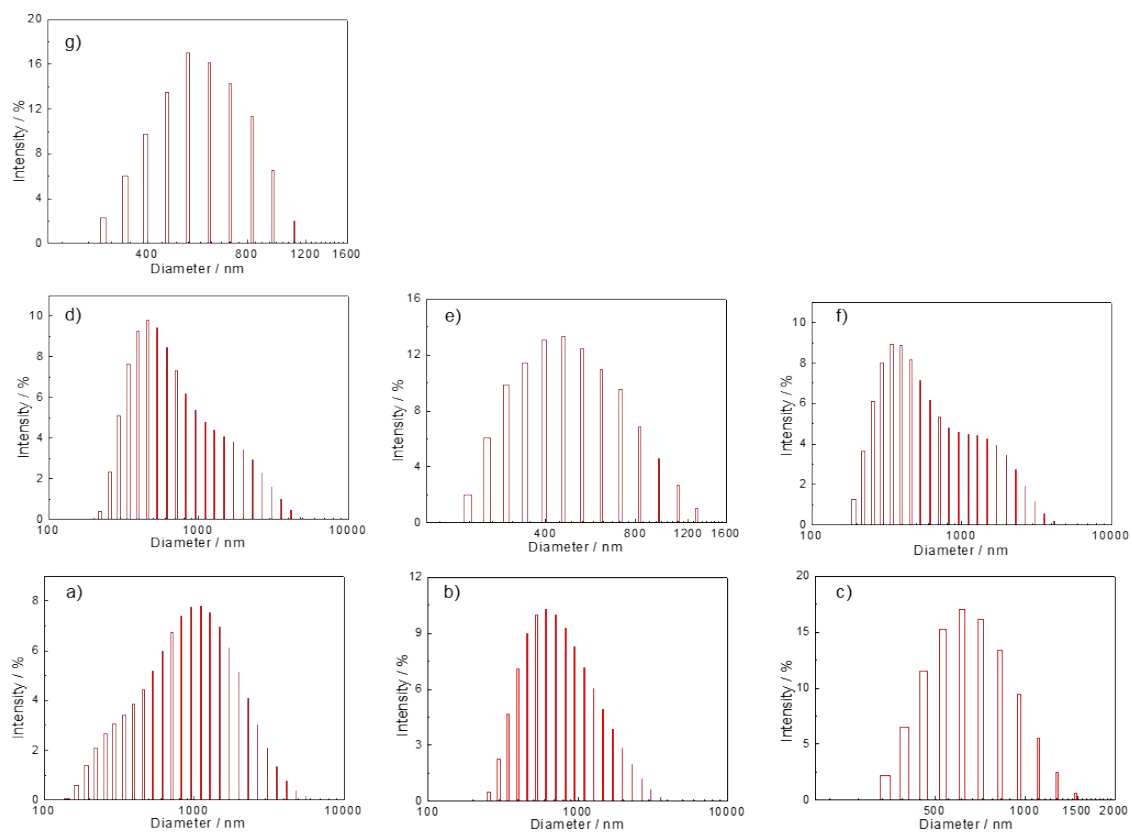

Figure S8. Distribution of hydrodynamic radii for PDEAm<sub>x</sub>-b-PTMC<sub>y</sub>, with  $x/y$  ratios of (a) 30/70, (b) 40/60, (c) 50/50, (d) 60/40, (e) 70/30, (f) 80/20, and (g) 90/10 at 55°C.

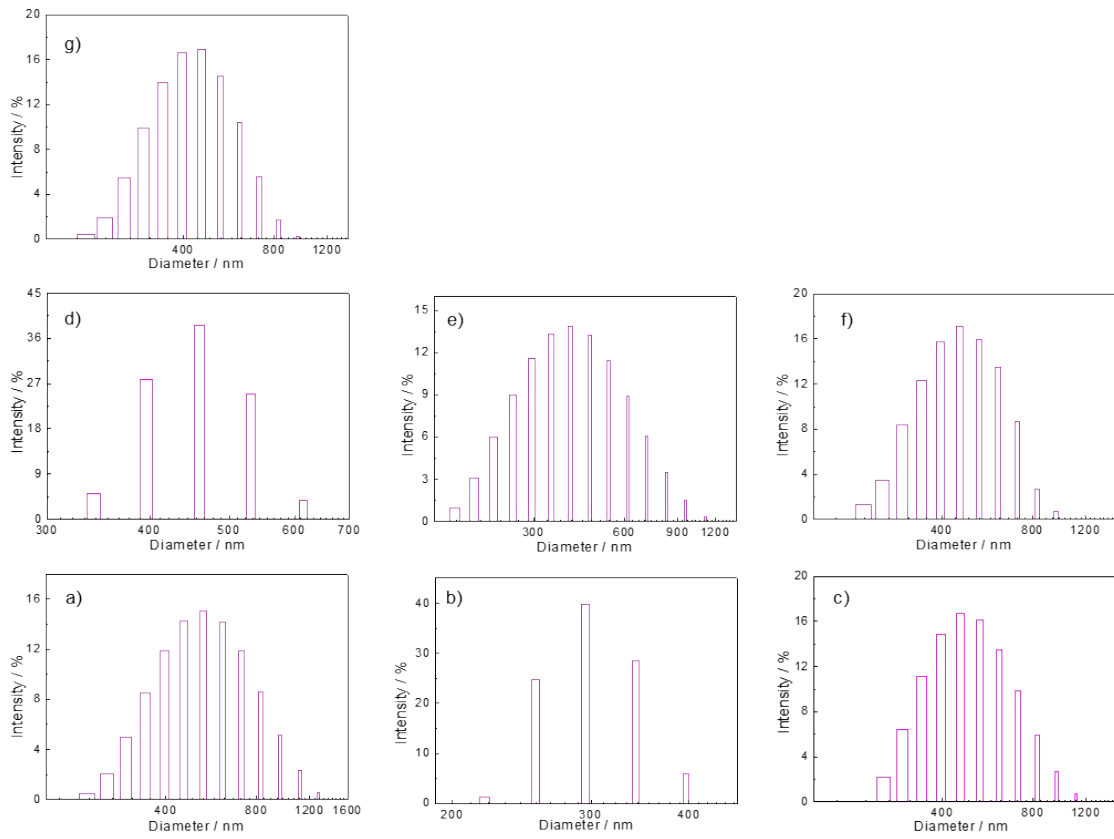

Figure S9. Distribution of hydrodynamic radii for PDEAm<sub>x</sub>-b-PLLA<sub>y</sub> with  $x/y$  ratios of (a) 30/70, (b) 40/60, (c) 50/50, (d) 60/40, (e) 70/30, (f) 80/20, and (g) 90/10 at 25°C.

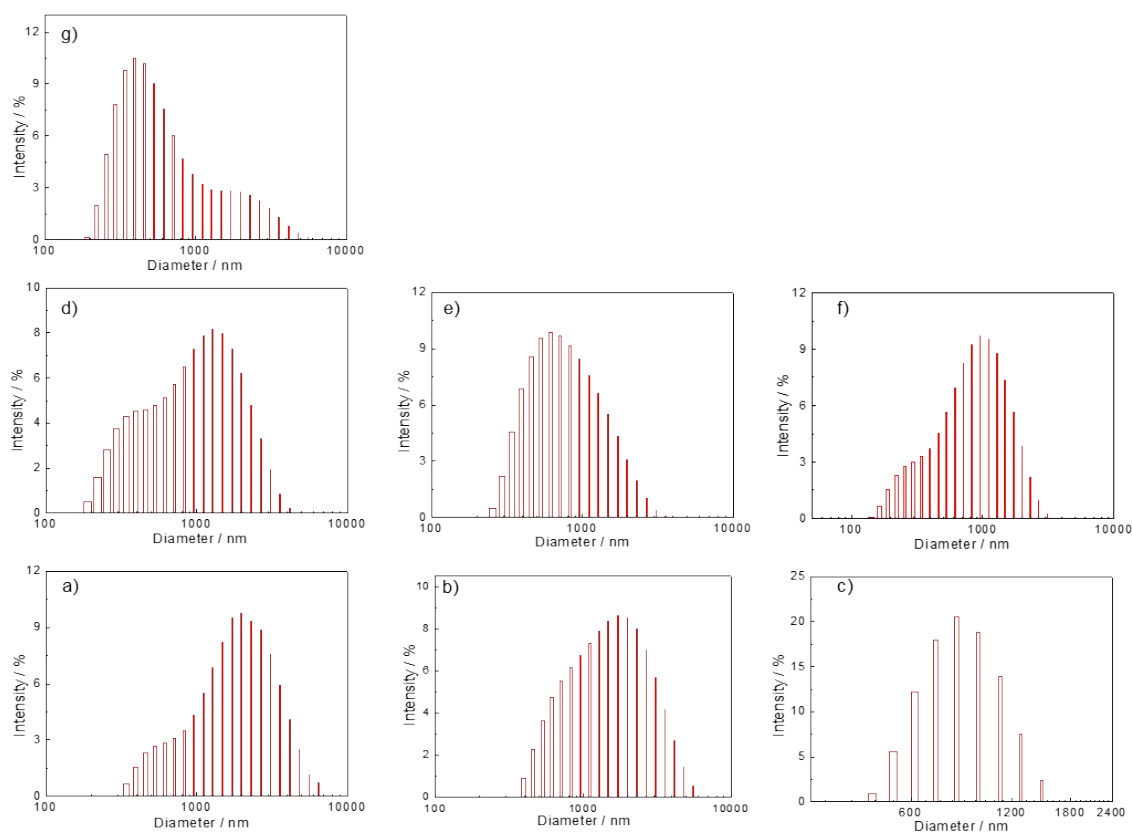

Figure S10. Distribution of hydrodynamic radii for PDEAm<sub>x</sub>-b-PLLA<sub>y</sub>, with  $x/y$  ratios of (a) 30/70, (b) 40/60, (c) 50/50, (d) 60/40, (e) 70/30, (f) 80/20, and (g) 90/10 at 55°C.
